# Supplementary material
Source: PubMed Central journal article supplement (PMC4866928)

1  
2  
3  
4  
5  
6  
7 **Akyloglossia: Where congenital anomaly surveillance meets the baby friendly initiative**  
8

9  
10  
11 K.S. Joseph MD, PhD, Brooke Kinniburgh MPH, Amy Metcalfe PhD, Neda Razaz MPH, Yasser  
12  
13 Sabr MD, MHSc, Sarka Lisonkova MD, PhD  
14  
15

16  
17  
18 Affiliations: Perinatal Services BC (Joseph, Kinniburgh), Provincial Health Services Authority,  
19  
20 Vancouver, Canada; Department of Obstetrics and Gynaecology (Joseph, Razaz, Sabr,  
21  
22 Lisonkova), University of British Columbia and the Children's and Women's Hospital and  
23  
24 Health Centre of British Columbia, Vancouver, Canada; School of Population and Public Health  
25  
26 (Joseph, Razaz, Lisonkova), University of British Columbia, Vancouver, Canada; Department of  
27  
28 Obstetrics and Gynecology (Metcalfe), University of Calgary, Calgary, Canada; Department of  
29  
30 Obstetrics and Gynaecology (Sabr), College of Medicine, King Saud University, Riyadh, Saudi  
31  
32  
33 Arabia.  
34  
35  
36

37  
38  
39 Word count: Abstract 250; Text 2,251  
40  
41  
42  
43

44  
45 Corresponding author:

46 Dr. K.S. Joseph

47  
48 Department of Obstetrics and Gynaecology

49  
50 Room C402, Women's Hospital of British Columbia

51  
52 4500 Oak Street, Vancouver, British Columbia, Canada V6H 3N1

53  
54 Tel: 604-875-2000 ext 4811; Fax: 604-875-2987 Email: kjoseph@cw.bc.ca  
55  
56  
57  
58  
59  
60

## Abstract

**Background:** Routine surveillance of congenital anomalies shows recent increases in ankyloglossia (tongue-tie). We examined the clinical and epidemiologic correlates of ankyloglossia and its surgical treatment (frenotomy) since several pediatric societies have stated that frenotomy among newborns cannot be recommended based on current evidence.

**Methods:** We carried out a population-based study of all live births in British Columbia, Canada, from 2004 to 2013 with data obtained from the British Columbia Perinatal Data Registry. Temporal trends in ankyloglossia and frenotomy, and associations with maternal and infant characteristics, were quantified using logistic regression.

**Results:** Rates of ankyloglossia rates increased by 70% (95% confidence interval [CI] 44-101%) from 5.0 in 2004 to 8.4 per 1,000 live births in 2013. Frenotomy rates increased from 2.8 in 2004 to 5.3 per 1,000 live births in 2013 (89% increase, 95% CI 52-134%). The regional health authorities with the lowest frenotomy rates (1.5 and 1.8 per 1,000 live births) had the lowest rates of ankyloglossia (3.8 and 4.6 per 1000 live births) and frenotomy given ankyloglossia (33.3% and 43.3%); the health authorities with the highest rates of frenotomy (5.2 and 5.3 per 1,000 live births) had high rates of ankyloglossia (7.3 and 8.2 per 1,000 live births) and the highest rates of frenotomy given ankyloglossia (63.6% and 72.1%). Nulliparity, multiple birth, male infant sex and birth weight were independently associated with ankyloglossia.

**Interpretation:** Spatio-temporal variations in ankyloglossia and frenotomy rates highlight the possibility of a diagnostic suspicion bias and increasing use of a potentially unnecessary surgery for infants.

## Introduction

Public health surveillance for congenital anomalies has a long tradition based partly on the lessons learnt following experience with thalidomide and phocomelia [1,2], and diethylstilbesterol and vaginal adenocarcinoma [3]. Outbreaks of congenital rubella syndrome have also served to reinforce the case for routine congenital anomaly surveillance [4]. In Canada, there has been an increased focus on such surveillance over the previous decade, with the Public Health Agency of Canada providing regular reports on neural tube and congenital heart defects, Down syndrome, orofacial clefts, limb deficiency defects, and gastroschisis [5].

Recent surveillance activities carried out as part of routine monitoring of population perinatal health in British Columbia, Canada [6], led to the identification of a temporal increase in ankyloglossia (tongue tie). This condition, characterized by an unusual band of tissue (lingual frenulum) that limits the range of movement of the tongue, can potentially interfere with feeding and speech. The unexpected increase in ankyloglossia in British Columbia was initially categorized as an incidental finding and dismissed as being of no clinical or public health importance. However, clinicians and hospital staff attributed the rise in ankyloglossia to increased ascertainment because of the Baby Friendly Hospital Initiative and support for breast feeding [7]. Increased focus on breast feeding initiation before hospital discharge may have led to heightened diagnostic suspicion of ankyloglossia and a potential increase in surgical correction of the condition (frenotomy). This issue is important because the Canadian Paediatric Society [8,9] (and some but not all pediatric societies [10-15]) have stated that frenotomy among newborns cannot be recommended based on current evidence. We therefore carried out a population-based study to examine the clinical and epidemiologic correlates of ankyloglossia.

## Methods

The study included all live births in British Columbia, Canada, between April 1, 2004 and March 31, 2014, with data obtained from the British Columbia Perinatal Data Registry. This population-based database contains detailed information on all mothers and babies in the province. Information in the database is collated by trained medical record abstractors using standardized forms and coding rules. Data quality is continually assessed by logic and consistency checks, and information in the database has been validated [16,17] and used extensively for health planning and research [18]. We restricted the study to the fiscal years from April 2004 to March 2014 (hereafter referred to as fiscal years 2004 to 2013) when diagnoses and procedures among mothers and babies were consistently coded with International Classification of Diseases version 10 (ICD10-CA) and the Canadian Classification of Health Interventions (CCI), respectively.

Appropriate diagnosis and procedure codes were used to identify cases of ankyloglossia (code Q381) and frenotomy (code 1FJ72 for frenectomy, lingual; frenotomy, lingual; frenulectomy, lingual and glossotomy, for tongue tie). We first examined rates of ankyloglossia by year, maternal characteristics (namely, parity, body mass index and plurality) and infant characteristics (namely sex, birth weight and gestational age). Rates of ankyloglossia were also quantified by length of hospital stay. The frequency of ankyloglossia and frenotomy was examined as a function of the rate of breast milk feeding and by regional health authority. The frequency of frenotomy among cases of ankyloglossia was examined by year to ascertain if surgery was being increasingly used to treat the condition and by regional health authority in order to ascertain potential spatial variation in surgery rates.

1  
2  
3 The precision of rate estimates was quantified using exact binomial 95% confidence  
4 intervals (CI) and the significance of temporal trends in rates was evaluated using a chi-square  
5 test for a linear trend in proportions. Associations between year, maternal characteristics and  
6 infant characteristics and ankyloglossia were quantified using proportion type rate ratios with  
7 95% confidence intervals. Logistic regression was used to obtain adjusted odds ratios expressing  
8 the association between year, maternal characteristics and infant characteristics and  
9 ankyloglossia. Since the frequency of ankyloglossia was low, odds ratio obtained from logistic  
10 models were interpreted as rate ratios. All analyses were carried out using SAS version 9.3 (SAS  
11 Institute Inc., Cary, NC, USA). The study was approved by the ethics review committee of the  
12 University of British Columbia (H13-00688).  
13  
14  
15  
16  
17  
18  
19  
20  
21  
22  
23  
24  
25

## 26 **Results**

27  
28  
29 There were 459,445 live births and 3,022 cases of ankyloglossia in British Columbia between  
30 2004 and 2013, yielding a birth prevalence of 6.6 per 1,000 live births (95% CI 6.3-6.8). The rate  
31 of ankyloglossia increased from 5.0 (95% CI 4.3-5.7) in 2004 to 6.4 (95% CI 5.7-7.2) in 2008,  
32 and to 8.4 (95% CI 7.6-9.3) per 1,000 live births in 2013 (P for linear trend <0.0001; Figure 1A).  
33 Rates of ankyloglossia varied significantly between the 5 regional health authorities; the lowest  
34 and highest rates were 3.8 per 1000 and 8.2 per 1000 live births, respectively (odds ratio highest  
35 vs lowest 2.15, 95% CI 1.92-2.40).  
36  
37  
38  
39  
40  
41  
42  
43  
44

45  
46 The frequency of ankyloglossia decreased with maternal age; infants of women  $\geq 40$  years  
47 of age were 0.81 (95% CI 0.66-1.00) times as likely to have ankyloglossia as compared with  
48 infants of mothers aged 20-24 years (Table 1). However, the declining trend in ankyloglossia  
49 with increasing maternal age was not statistically significant (P for linear trend 0.20). Infants of  
50 nulliparous women and women with a BMI  $\geq 30$  kg/m<sup>2</sup> had relatively high rates of ankyloglossia;  
51  
52  
53  
54  
55  
56  
57  
58  
59  
60

1  
2  
3 the increase in ankyloglossia rates with increasing BMI was of borderline significance (P for  
4 linear trend 0.06). Male infant sex was associated with a higher rate of ankyloglossia (rate ratio  
5 1.72, 95% CI 1.60-1.85), while preterm infants had relatively lower rates compared with term  
6 and post-term infants (P for linear trend <0.0001). Birth weight was also associated with  
7 ankyloglossia; infants weighing <3,000 g had relatively low rates, while infants with birth  
8 weights  $\geq$ 4,000 g had relatively high rates compared with infants with a birth weight between  
9 3,000 and 3,499 g. There was a significant linear trend in ankyloglossia rates with increasing  
10 birth weight (P <0.0001).  
11  
12  
13  
14  
15  
16  
17  
18  
19  
20  
21

22 Table 2 shows the relationship between the length of hospital stay for the infant during  
23 the birth admission and rates of ankyloglossia. Rates of ankyloglossia increased steadily from 3.6  
24 per 1,000 live births among infants discharged within 24 hours after birth to 5.9, 8.1, 9.1 and 9.3  
25 per 1,000 live births among infants with a length of stay of 24-47 hours, 48-71 hours, 72-95  
26 hours and 96-167 hours, respectively. Infants admitted in hospital for 168 hours or more had an  
27 ankyloglossia rate of 4.7 per 1,000 live births.  
28  
29  
30  
31  
32  
33  
34  
35

36 Table 3 presents the results of the logistic regression analyses carried out among term  
37 infants; significant determinants of ankyloglossia included nulliparity (vs multiparity; adjusted  
38 rate ratio [aRR] 1.47, 95% CI 1.36-1.59), BMI  $\geq$ 30 kg/m<sup>2</sup> (vs BMI 18-24; aRR 1.14, 95% CI  
39 1.00-1.30), multiple birth vs singleton; aRR 0.68, 95% CI 0.63-0.74), male infant sex (vs female;  
40 aRR 1.74, 95% CI 1.61-1.89), birth weight 4000-4499 g and  $\geq$ 4500 g (vs birth weight 3000-3499  
41 g; aRR 1.26, 95% CI 1.12-1.42 and aRR 1.39, 95% CI 1.11-1.76, respectively). Adjusted rates of  
42 ankyloglossia were also significantly higher in the years 2008 to 2013 compared with 2004 (aRR  
43 2013 vs 2004 1.70, 95% CI 1.43-2.02).  
44  
45  
46  
47  
48  
49  
50  
51  
52  
53  
54

55 There were 1,765 frenotomy procedures carried out among study infants, yielding a  
56  
57  
58  
59  
60

1  
2  
3 frenotomy rate of 3.8 (95% CI 3.7-4.0) per 1000 live births. The rate of frenotomy increased by  
4  
5 89% (95% CI 52-134%) from 2.8 per 1000 live births in 2004 to 5.3 per 1000 live births in 2013.  
6  
7  
8 The association between maternal and infant characteristics and frenotomy was similar in  
9  
10 direction and magnitude to the association between maternal and infant characteristics and  
11  
12 ankyloglossia (Table 4).  
13  
14

15 The temporal increase in frenotomy rates paralleled the temporal increase in  
16  
17 ankyloglossia rates (Figure 1A) and annual rates of ankyloglossia and frenotomy were closely  
18  
19 correlated (correlation coefficient 0.98, P value <0.001). Rates of frenotomy varied between the  
20  
21 different health authorities with the lowest and highest rates being 1.8 per 1,000 and 5.3 per  
22  
23 1,000 live births (odds ratio for frenotomy: highest vs lowest 2.99, 95% CI 2.49-3.58). Both  
24  
25 ankyloglossia and frenotomy rates increased as rates of breast milk feeding increased from 93%  
26  
27 to 95% (Figure 1B); annual rates of ankyloglossia and frenotomy were closely correlated with  
28  
29 breast milk feeding (correlation coefficient 0.93, P value <0.0001 for ankyloglossia and  
30  
31 correlation coefficient 0.92, P value <0.0001 for frenotomy).  
32  
33  
34  
35

36 The rate of frenotomy among ankyloglossia cases was 58.0%; this rate increased non-  
37  
38 significantly and in a nonlinear fashion from 57.1% in 2004 to 63.5% in 2013 (11% increase,  
39  
40 95% CI -3 to 28%; Figure 1C). The 2 regional health authorities with the lowest frenotomy rates  
41  
42 (1.5 and 1.8 per 1,000 live births) had the lowest rates of ankyloglossia (3.8 and 4.6 per 1000 live  
43  
44 births) and frenotomy given ankyloglossia (33.3% and 43.3%). On the other hand, the 2 health  
45  
46 authorities with the highest rates of frenotomy (5.2 and 5.3 per 1,000 live births) had high rates  
47  
48 of ankyloglossia (7.3 and 8.2 per 1,000 live births) and the highest rates of frenotomy given  
49  
50 ankyloglossia (63.6% and 72.1%).  
51  
52  
53  
54  
55  
56  
57  
58  
59  
60

## Discussion

Our study showed that rates of ankyloglossia increased by 70% from 5.0 per 1,000 live births in 2004 to 8.4 per 1,000 live births in 2013. Over the same period, rates of frenotomy increased by 89% from 2.8 per 1,000 live births in 2004 to 5.3 per 1,000 live births in 2013. Nulliparity, obesity, male infant sex and macrosomia were positively associated with ankyloglossia, while preterm birth and twin and higher-order plurality were protective factors. There was a monotonic increase in ankyloglossia rates with duration of hospital stay from <24 hours to 96-167 hours. Maternal and infant characteristics associated with frenotomy were similar to those associated ankyloglossia and there was a 2- to 3-fold variation in regional ankyloglossia and frenotomy rates.

The strengths of our study included its population-based provenance, the large study size and detailed information on maternal and infant characteristics, diagnoses and procedures. Study limitations included the sporadic and symptom prompted nature of the diagnosis of ankyloglossia, which likely distorted the birth prevalence. The bias also likely distorted the relationship between risk/protective factors and ankyloglossia, albeit to a lesser extent. Some transcription errors and missing values with regard to maternal and infant characteristics were also likely as such deficiencies are inevitable in large population-based databases.

The rate of ankyloglossia in our study was 6.6 per 1000 live births and this is significantly lower than estimates from previous studies that have typically yielded birth prevalence rates of 4% to 10% (range 0.02% to 11%) [19-24]. This underestimation of prevalence is not surprising as there is no consensus on the definition and diagnostic criteria for ankyloglossia and the anomaly is typically asymptomatic. Diagnosis of ankyloglossia and other minor congenital anomalies during routine hospitalization for childbirth is typically sporadic and



1  
2  
3 symptom prompted (i.e., it is especially likely when problems arise with infant feeding). With  
4  
5 the recent increased emphasis on breast feeding initiation before hospital discharge because of  
6  
7 the Baby Friendly Hospital Initiative, it is not surprising that ankyloglossia is being diagnosed  
8  
9 with increasing frequency.  
10  
11

12  
13 Our study showed that maternal nulliparity and obesity and infant's male sex, and  
14  
15 macrosomia were positively associated, while preterm birth and multiple births were negatively  
16  
17 associated with ankyloglossia. However, the true relationship between these factors and  
18  
19 ankyloglossia may have been somewhat distorted in our study because of the symptom prompted  
20  
21 nature of the diagnosis. The strength of the association between the risk/protective factors in our  
22  
23 study was likely influenced by associations between the above mentioned factors and breast  
24  
25 feeding difficulties.  
26  
27

28  
29 There has been a longstanding controversy over the optimal management of infants  
30  
31 diagnosed with ankyloglossia and breast feeding problems and this is reflected in contemporary  
32  
33 national and international guidelines. The Canadian Paediatric Society's 2011 and 2014 position  
34  
35 statements on ankyloglossia state that frenotomy cannot be recommended based on the available  
36  
37 evidence [8,9]. The Dutch and Japanese Pediatric Societies [10-12] also do not endorse  
38  
39 frenotomy, while the United Kingdom's National Institute for Health and Care Excellence  
40  
41 recommendations mention both conservative management and early surgical division for cases  
42  
43 of ankyloglossia associated with breast feeding problems [13]. UNICEF's Baby Friendly  
44  
45 Hospital Initiative [14] and the American Academy of Pediatrics [15] recommend early  
46  
47 frenotomy for symptomatic ankyloglossia and describe it as a simple, safe and efficacious  
48  
49 procedure. This lack of consensus on the treatment of ankyloglossia arises because of the quality  
50  
51 of the evidence on the efficacy of frenotomy. Although several randomized trials have been  
52  
53  
54  
55  
56  
57  
58  
59  
60

1  
2  
3 carried out to assess the efficacy of frenotomy for ankyloglossia associated breast feeding  
4 difficulties [25-29], they are all relatively small studies, with methodological problems related to  
5 inclusion criteria, lack of blinding and subjectively defined outcomes.  
6  
7  
8  
9

10 Rates of frenotomy in British Columbia exhibited a substantial spatial variation by  
11 regional health authority, as did rates of frenotomy given ankyloglossia. This is concerning  
12 insofar as it reflects arbitrariness with regard to the diagnosis of ankyloglossia and in the use of a  
13 potentially unnecessary surgical procedure among newborn infants. The controversy with regard  
14 to the use of frenotomy has been framed as a conflict between lactation nurses, breast feeding  
15 support groups and mothers who have experienced difficulties in breast feeding versus  
16 pediatricians who are focussed on the evidence for the efficacy of frenotomy [30]. The latter  
17 position is also informed by a culture that has increasingly rejected minor surgical intervention  
18 (e.g., tonsillectomy, ear tubes) for babies and children with the understanding that most  
19 conditions improve spontaneously.  
20  
21  
22  
23  
24  
25  
26  
27  
28  
29  
30  
31  
32  
33

34 In conclusion, our study showed a temporal increase in the rate of ankyloglossia  
35 and a corresponding increase in the frequency of frenotomy. The wide spatial variation evident  
36 in population rates of frenotomy suggests arbitrary differences in practice patterns with regard to  
37 such surgery for newborn infants. Better diagnostic criteria for ankyloglossia, clear indications  
38 for frenotomy, improved communication and more detailed clinical practice guidelines are  
39 necessary for ensuring that infants with breast feeding problems due to ankyloglossia are treated  
40 appropriately. Surgical treatment for ankyloglossia should be available when indicated and  
41 unnecessary surgery in infancy should be avoided.  
42  
43  
44  
45  
46  
47  
48  
49  
50  
51  
52  
53  
54  
55  
56  
57  
58  
59  
60

1  
2  
3  
4 **Contributor statement:** KSJ proposed the study and carried out the analyses. KSJ, BK, AM,  
5 NR, YS and SL reviewed the preliminary and final analyses and the initial draft of the paper, and  
6 contributed to final version of the manuscript. All authors agree to act as guarantors of the work.  
7  
8

9 **Acknowledgements:** KSJ's is supported by the Child and Family Research Institute and a Chair  
10 award from the Canadian Institutes of Health Research (APR-126338).  
11  
12  
13  
14  
15  
16  
17  
18  
19  
20  
21  
22  
23  
24  
25  
26  
27  
28  
29  
30  
31  
32  
33  
34  
35  
36  
37  
38  
39  
40  
41  
42  
43  
44  
45  
46  
47  
48  
49  
50  
51  
52  
53  
54  
55  
56  
57  
58  
59  
60

Confidential

**References**

1. McBride WG. Thalidomide and congenital abnormalities. *Lancet* 1961;278:1358.
2. Lowry RB, Thunem NY, Anderson-Redick S. Alberta Congenital Anomalies Surveillance System. *CMAJ* 1989;141:1155-9.
3. Herbst AL, Ulfelder H, Poskanzer DC. Adenocarcinoma of the vagina. Association of maternal stilbestrol therapy with tumor appearance in young women. *N Engl J Med* 1971;284:878-81.
4. Centers for Disease Control and Prevention (CDC). Elimination of rubella and congenital rubella syndrome--United States, 1969-2004. *MMWR Morb Mortal Wkly Rep* 2005;54:279-82.
5. Congenital anomalies in Canada 2013: a perinatal health surveillance report. Public Health Agency of Canada. Ottawa, 2013.
6. Joseph KS, Metcalfe A, Kinniburgh B, Sabr Y, Langlois S, Gagnon A. Temporal trends in the birth prevalence of congenital anomalies in British Columbia, Canada, 2000 to 2011. *Healthy Mothers and Healthy Babies: New Research and Best Practice Conference*. Vancouver, Canada February 2014. ( available at [http://www.perinatalservicesbc.ca/NR/rdonlyres/FAA41FA2-63D1-4CE8-8FEA-9637E7948BFE/0/PSBCConference2014Syllabus\\_2SessionC.pdf](http://www.perinatalservicesbc.ca/NR/rdonlyres/FAA41FA2-63D1-4CE8-8FEA-9637E7948BFE/0/PSBCConference2014Syllabus_2SessionC.pdf) page 23;C3i).
7. Baby-friendly hospital initiative: Revised, updated and expanded for integrated care. World Health Organization and UNICEF. Geneva, 2009.
8. Rowan-Legg A; Canadian Paediatric Society. Ankyloglossia and breastfeeding. Position Statement. February 2014.
9. Rowan-Legg A. Ankyloglossia and breastfeeding. *Paediatr Child Health* 2011 ;16:222.

- 1  
2  
3 10. Post ED, Rupert AW, Schulpen TW. [Problematic breastfeeding due to a short frenulum].  
4  
5 Ned Tijdschr Geneesk. 2010;154:A918.  
6  
7
- 8 11. Constantine AH, Williams C, Sutcliffe AG. A systematic review for ankyloglossia  
9  
10 (tongue-tie) in breast fed infants. Arch Dis Child 2011;96 (S1):A62–3.  
11
- 12 12. Committee of Ethics, Japan Pediatric Society. Survey on operative treatment in  
13  
14 ankyloglossia and its results. J Japan Pediatr Soc 2001;105:520–22.  
15
- 16 13. National Institute for Health and Care Excellence. Division of ankyloglossia  
17  
18 (tongue-tie) for breastfeeding. NICE interventional procedure guidance [IPG149].  
19  
20 December 2005 (<https://www.nice.org.uk/guidance/ipg149>) Accessed March 31, 2015.  
21  
22
- 23 14. What mothers need to know about tongue-tie. <http://www.unicef.org.uk/BabyFriendly>  
24  
25 /Parents/Problems/Tongue-Tie/Division-of-tongue-tie/ (accessed March 31, 2015).  
26  
27
- 28 15. American Academy of Pediatrics. Breastfeeding: best for baby and mother.  
29  
30 <http://www2.aap.org/breastfeeding/files/pdf/BBM-8-27%20Newsletter.pdf> (accessed  
31  
32 March 31, 2015).  
33  
34
- 35 16. Frosst G. Validity of Pre-Pregnancy Body Mass Index (BMI) Information Derived From  
36  
37 a Population-based Perinatal Database Healthy Mothers and Healthy Babies: New  
38  
39 Research and Best Practice Conference. Vancouver, Canada February 2014. (available at  
40  
41 <http://www.perinatalervicesbc.ca/NR/rdonlyres/09720F2E-525C-4B6F-B65F->  
42  
43 [CF5720D68014/0/PSBCConference2014Syllabus\\_2SessionB.pdf](http://www.perinatalervicesbc.ca/NR/rdonlyres/09720F2E-525C-4B6F-B65F-CF5720D68014/0/PSBCConference2014Syllabus_2SessionB.pdf) page 34;B3ii).  
44  
45  
46
- 47 17. Frosst G, Hutcheon J, Joseph KS, Kinniburgh B, Johnson C, Lee L. Validating the British  
48  
49 Columbia Perinatal Data Registry: a chart re-abstraction study. BMC Pregnancy  
50  
51 Childbirth (in press).  
52  
53  
54  
55  
56  
57  
58  
59  
60

- 1  
2  
3  
4 18. Special Reports. Data and surveillance. Perinatal Services BC. Vancouver, British  
5  
6 Columbia, Canada 2015. <http://www.perinataleservicesbc.ca/DataAndSurveillance>  
7  
8 /Surveillance/SpecialReports/default.htm  
9
- 10  
11 19. Messner AH, Lalakea ML, Aby J, Macmahon J, Bair E. Ankyloglossia: incidence and  
12  
13 associated feeding difficulties. *Arch Otolaryngol Head Neck Surg* 2000;126 :36– 39  
14
- 15  
16 20. Ballard JL, Auer CE, Khoury JC. Ankyloglossia: assessment, incidence, and effect of  
17  
18 frenuloplasty on the breastfeeding dyad. *Pediatrics* 2002;110:e63.  
19
- 20  
21 21. Griffiths D. Do tongue ties affect breastfeeding? *J Hum Lact* 2004;20:409-14.  
22
- 23  
24 22. Ricke L, Baker N, Madlon-Kay D, DeFor T. Newborn tongue-tie: prevalence and effect  
25  
26 on breast-feeding. *J Am Board Fam Pract* 2005;18:1-7.  
27
- 28  
29 23. Hogan M, Westcott C, Griffiths M. Randomized, controlled trial of division of tongue-tie  
30  
31 in infants with feeding problems. *J Paediatr Child Health* 2005;41:246-50.  
32
- 33  
34 24. Segal LM, Stephenson R, Dawes M, et al. Prevalence, diagnosis, and treatment of  
35  
36 ankyloglossia: methologic review. *Can Fam Physician* 2007;53:1027.  
37
- 38  
39 25. Hogan M, Wescott C, Griffiths M. Randomised controlled trial of division of  
40  
41 tongue-tie in infants with feeding problems. *J Pediatr Child Health* 2005;41:24.  
42
- 43  
44 26. Dollberg S, Botzer E, Grunis E, et al. Immediate nipple pain relief after frenotomy in  
45  
46 breast-fed infants with ankyloglossia: a randomized, prospective study. *J Pediatr*  
47  
48 *Surg* 2006;41:1598–600.  
49
- 50  
51 27. Buryk M, Bloom D, Shope T. Efficacy of neonatal release of ankyloglossia:  
52  
53 a randomized trial. *Pediatrics* 2011;128:280–6.  
54
- 55  
56 28. Berry J, Griffiths M, Westcott C. A double-blind, randomized, controlled trial on  
57  
58 tongue-tie division and immediate effect on breastfeeding. *Breastfeed Med*  
59  
60

1  
2  
3 2012;7:189–93.  
4

5  
6 29. Emond A, Ingram J, Johson D, et al. Randomised controlled trial of early frenotomy  
7  
8 in breastfed infants with mild-moderate tongue-tie. Arch Dis Child Fetal Neonatal  
9  
10 Ed 2014;99:F189–95.  
11  
12

13 30. Power RF, Murphy JF. Tongue-tie and frenotomy in infants with breastfeeding  
14  
15 difficulties: achieving a balance. Arch Dis Child. 2014 Nov 7. pii: archdischild-2014-  
16  
17 306211. doi: 10.1136/archdischild-2014-306211. [Epub ahead of print]  
18  
19  
20  
21  
22  
23  
24  
25  
26  
27  
28  
29  
30  
31  
32  
33  
34  
35  
36  
37  
38  
39  
40  
41  
42  
43  
44  
45  
46  
47  
48  
49  
50  
51  
52  
53  
54  
55  
56  
57  
58  
59  
60

Confidential

Table 1. Frequency of ankyloglossia by maternal and infant characteristics among all live births, British Columbia, Canada, 2004 to 2013.

| Maternal and infant characteristic | Number of live births | Ankyloglossia |                                 |                     |
|------------------------------------|-----------------------|---------------|---------------------------------|---------------------|
|                                    |                       | Number        | Rate/1,000 live births (95% CI) | Rate ratio (95% CI) |
| Maternal age (years): <20          | 14,073                | 98            | 7.0 (5.7-8.5)                   | 1.01 (0.81-1.25)    |
| 20-24 (ref.)                       | 61,794                | 428           | 6.9 (6.3-7.6)                   | 1.00 ( - )          |
| 25-29                              | 126,550               | 811           | 6.4 (6.0-6.9)                   | 0.93 (0.82-1.04)    |
| 30-34                              | 151,380               | 1,016         | 6.7 (6.3-7.1)                   | 0.97 (0.87-1.08)    |
| 35-39                              | 85,717                | 557           | 6.5 (6.0-7.1)                   | 0.94 (0.83-1.06)    |
| ≥40                                | 19,927                | 112           | 5.6 (4.6-6.8)                   | 0.81 (0.66-1.00)    |
| Parity: Nulliparous                | 214,690               | 1,656         | 7.7 (7.3-8.1)                   | 1.38 (1.29-1.48)    |
| Multiparous (ref.)                 | 244,728               | 1,366         | 5.6 (5.3-5.9)                   | 1.00 ( - )          |
| BMI (kg/m <sup>2</sup> ): <18      | 19,449                | 120           | 6.2 (5.1-7.4)                   | 0.94 (0.78-1.13)    |
| 18-24 (ref.)                       | 194,100               | 1,276         | 6.6 (6.2-6.9)                   | 1.00 ( - )          |
| 25-29                              | 66,173                | 439           | 6.6 (6.0-7.3)                   | 1.01 (0.91-1.12)    |
| ≥30                                | 40,720                | 302           | 7.4 (6.6-8.3)                   | 1.13 (1.00-1.28)    |
| Missing                            | 139,003               | 885           | 6.4 (6.0-6.8)                   | 0.97 (0.89-1.05)    |
| Plurality: Singleton (ref.)        | 443,374               | 2,956         | 6.7 (6.4-6.9)                   | 1.00 ( - )          |
| Multiple                           | 16,071                | 66            | 4.1 (3.2-5.2)                   | 0.62 (0.49-0.79)    |
| Gest age (weeks): <28*             | 1,846                 | <5            | <2.7 (0.9-6.3)                  | <0.38 (0.16-0.92)   |
| 28-36                              | 39,573                | 209           | 5.3 (4.6-6.0)                   | 0.75 (0.65-0.86)    |
| 37-43 (ref.)                       | 390,194               | 2,754         | 7.1 (6.8-7.3)                   | 1.00 ( - )          |
| Missing                            | 27,832                | 55            | 1.9 (1.5-2.6)                   | 0.28 (0.21-0.37)    |
| Birth weight (g): <1500            | 4,711                 | 10            | 2.1 (1.0-3.9)                   | 0.33 (0.18-0.62)    |
| 1500-1999                          | 7,003                 | 17            | 2.4 (1.4-3.9)                   | 0.38 (0.24-0.61)    |
| 2000-2499                          | 18,469                | 66            | 3.6 (2.8-4.5)                   | 0.57 (0.45-0.72)    |
| 2500-2999                          | 69,407                | 406           | 5.8 (5.3-6.4)                   | 0.92 (0.85-1.00)    |
| 3000-3499 (ref.)                   | 163,673               | 1,075         | 6.6 (6.2-7.0)                   | 1.00 ( - )          |
| 3500-3999                          | 137,549               | 967           | 7.0 (6.6-7.5)                   | 1.04 (0.99-1.09)    |
| 4000-4499                          | 46,636                | 393           | 8.4 (7.6-9.3)                   | 1.23 (1.13-1.34)    |
| ≥4500                              | 8,845                 | 83            | 9.4 (7.5-11.6)                  | 1.48 (1.19-1.84)    |
| Missing                            | 3,152                 | 5             | 1.6 (0.5-3.7)                   | 0.25 (0.10-0.60)    |
| Infant sex: Male                   | 237,230               | 1,957         | 8.2 (7.9-8.6)                   | 1.72 (1.60-1.85)    |
| Female (ref.)                      | 222,208               | 1,065         | 4.8 (4.5-5.1)                   | 1.00 ( - )          |
| Year 2004 (ref.)                   | 42,802                | 212           | 5.0 (4.3-5.7)                   | 1.00 ( - )          |
| 2005                               | 43,147                | 233           | 5.4 (4.7-6.1)                   | 1.09 (0.90-1.31)    |
| 2006                               | 44,208                | 215           | 4.9 (4.2-5.6)                   | 0.98 (0.81-1.19)    |
| 2007                               | 46,617                | 258           | 5.5 (4.9-6.3)                   | 1.12 (0.93-1.34)    |
| 2008                               | 47,491                | 304           | 6.4 (5.7-7.2)                   | 1.29 (1.09-1.54)    |
| 2009                               | 47,762                | 306           | 6.4 (5.7-7.2)                   | 1.29 (1.09-1.54)    |
| 2010                               | 46,592                | 327           | 7.0 (6.3-7.8)                   | 1.41 (1.19-1.68)    |
| 2011                               | 47,025                | 396           | 8.4 (7.6-9.3)                   | 1.70 (1.44-2.01)    |
| 2012                               | 47,320                | 379           | 8.0 (7.2-8.8)                   | 1.62 (1.37-1.91)    |
| 2013                               | 46,481                | 392           | 8.4 (7.6-9.3)                   | 1.70 (1.44-2.01)    |
| Total                              | 459,445               | 3,022         | 6.6 (6.3-6.8)                   | -                   |



Table 2. Frequency of ankyloglossia by length of infant's hospital stay among all live births, British Columbia, Canada, 2004 to 2013.

| Length of stay (hours) | Number of live births | Ankyloglossia |                |                     |
|------------------------|-----------------------|---------------|----------------|---------------------|
|                        |                       | Number        | Rate           | Rate ratio (95% CI) |
| <24                    | 47,703                | 174           | 3.6 (3.1-4.2)  | 0.62 (0.53-0.72)    |
| 24-47 (ref.)           | 182,578               | 1,079         | 5.9 (5.6-6.3)  | 1.00 ( - )          |
| 48-71                  | 104,509               | 850           | 8.1(7.6-8.7)   | 1.38 (1.26-1.51)    |
| 72-95                  | 59,906                | 546           | 9.1 (8.4-9.9)  | 1.54 (1.39-1.71)    |
| 96-167                 | 28,940                | 268           | 9.3 (8.2-10.4) | 1.57 (1.37-1.79)    |
| ≥168                   | 13,404                | 63            | 4.7 (3.6-6.0)  | 0.80 (0.62-1.02)    |
| Missing                | 22,405                | 42            | 1.9 (1.4-2.5)  | 0.32 (0.23-0.43)    |
| Total                  | 459,445               | 3,022         | 6.6 (6.3-6.8)  | -                   |

Table 3. Logistic regression analyses showing crude and adjusted rate ratios (aRR) with 95% confidence intervals (CI) expressing the association between maternal and infant determinants and ankyloglossia among term (3-43 weeks) live births, British Columbia, Canada, 2004 to 2013.

| Determinants                  | Live births | Ankyloglossia |      | RR   | 95% CI    | aRR  | 95% CI    |
|-------------------------------|-------------|---------------|------|------|-----------|------|-----------|
|                               |             | Number        | Rate |      |           |      |           |
| Age <20 years                 | 11,504      | 92            | 8.0  | 1.07 | 0.85-1.34 | 0.98 | 0.78-1.23 |
| 20-24 (ref.)                  | 52,289      | 391           | 7.5  | 1.00 | ( - )     | 1.00 | ( - )     |
| 25-29                         | 108,508     | 742           | 6.8  | 0.91 | 0.81-1.03 | 0.93 | 0.83-1.06 |
| 30-34                         | 129,939     | 930           | 7.2  | 0.96 | 0.85-1.08 | 1.01 | 0.90-1.14 |
| 35-39                         | 71,894      | 495           | 6.9  | 0.92 | 0.81-1.05 | 1.01 | 0.88-1.16 |
| ≥40                           | 15,968      | 104           | 6.5  | 0.87 | 0.70-1.08 | 0.96 | 0.78-1.20 |
| Parity 0                      | 180,970     | 1,519         | 8.4  | 1.42 | 1.32-1.54 | 1.47 | 1.36-1.59 |
| ≥1 (ref.)                     | 209,121     | 1,235         | 5.9  | 1.00 | ( - )     | 1.00 | ( - )     |
| BMI (kg/m <sup>2</sup> ): <18 | 16,473      | 106           | 6.4  | 0.92 | 0.75-1.12 | 0.94 | 0.77-1.14 |
| 18-24 (ref.)                  | 167,813     | 1,174         | 7.0  | 1.00 | ( - )     | 1.00 | ( - )     |
| 25-29                         | 56,208      | 398           | 7.1  | 1.01 | 0.90-1.13 | 1.01 | 0.90-1.14 |
| ≥30                           | 33,730      | 270           | 8.0  | 1.15 | 1.00-1.31 | 1.14 | 1.00-1.30 |
| Missing                       | 115,881     | 806           | 7.0  | 0.99 | 0.91-1.09 | 1.06 | 0.97-1.16 |
| Plurality: Singleton (ref.)   | 385,104     | 2,727         | 7.1  | 1.00 | ( - )     | 1.00 | ( - )     |
| Multiple                      | 4,995       | 27            | 5.4  | 0.76 | 0.52-1.11 | 0.68 | 0.63-0.74 |
| Infant sex: Female (ref.)     | 190,993     | 966           | 5.1  | 1.00 | ( - )     | 1.00 | ( - )     |
| Male                          | 199,106     | 1,788         | 9.0  | 1.78 | 1.65-1.93 | 1.74 | 1.61-1.89 |
| Birth wt.*: 2000-2499 g       | 5,315       | 31            | 5.8  | 0.88 | 0.61-1.25 | 0.90 | 0.63-1.29 |
| 2500-2999                     | 50,987      | 311           | 6.1  | 0.92 | 0.81-1.04 | 0.94 | 0.82-1.06 |
| 3000-3499 (ref.)              | 149,808     | 996           | 6.6  | 1.00 | ( - )     | 1.00 | ( - )     |
| 3500-3999                     | 131,133     | 945           | 7.2  | 1.08 | 0.99-1.19 | 1.06 | 0.97-1.16 |
| 4000-4499                     | 44,505      | 389           | 8.7  | 1.32 | 1.17-1.48 | 1.26 | 1.12-1.42 |
| ≥4500                         | 8,127       | 80            | 9.8  | 1.49 | 1.18-1.87 | 1.39 | 1.11-1.76 |
| Year 2004 (ref.)              | 36,593      | 199           | 5.4  | 1.00 | ( - )     | 1.00 | ( - )     |
| 2005                          | 36,791      | 218           | 5.9  | 1.09 | 0.90-1.32 | 1.09 | 0.90-1.32 |
| 2006                          | 37,802      | 202           | 5.3  | 0.98 | 0.81-1.20 | 0.98 | 0.80-1.19 |
| 2007                          | 39,743      | 232           | 5.8  | 1.07 | 0.89-1.30 | 1.07 | 0.88-1.29 |
| 2008                          | 40,267      | 281           | 7.0  | 1.29 | 1.07-1.54 | 1.28 | 1.06-1.53 |
| 2009                          | 40,367      | 282           | 7.0  | 1.29 | 1.07-1.54 | 1.28 | 1.07-1.54 |
| 2010                          | 39,610      | 279           | 7.0  | 1.30 | 1.08-1.56 | 1.29 | 1.08-1.55 |
| 2011                          | 39,827      | 366           | 9.2  | 1.70 | 1.43-2.02 | 1.70 | 1.43-2.02 |
| 2012                          | 39,936      | 335           | 8.4  | 1.55 | 1.30-1.84 | 1.55 | 1.30-1.85 |
| 2013                          | 39,169      | 360           | 9.2  | 1.70 | 1.43-2.02 | 1.70 | 1.43-2.02 |

\*Results for live births <2000 g not shown because of small numbers (<5 cases).

Table 4. Logistic regression analyses showing crude and adjusted rate ratios (aRR) with 95% confidence intervals (CI) expressing the association between maternal and infant determinants and frenotomy among term (37-43 weeks) live births, British Columbia, Canada, 2004 to 2013.

| Determinants                  | Live births | Frenotomy |      | RR   | 95% CI    | aRR  | 95% CI    |
|-------------------------------|-------------|-----------|------|------|-----------|------|-----------|
|                               |             | Number    | Rate |      |           |      |           |
| Age <20 years                 | 11,504      | 92        | 8.0  | 1.86 | 1.46-2.37 | 1.12 | 0.84-1.49 |
| 20-24 (ref.)                  | 52,289      | 225       | 4.3  | 1.00 | ( - )     | 1.00 | ( - )     |
| 25-29                         | 108,508     | 447       | 4.1  | 0.96 | 0.82-1.12 | 0.98 | 0.83-1.15 |
| 30-34                         | 129,939     | 546       | 4.2  | 0.98 | 0.84-1.14 | 1.04 | 0.89-1.21 |
| 35-39                         | 71,894      | 281       | 3.9  | 0.91 | 0.76-1.08 | 1.01 | 0.84-1.21 |
| ≥40                           | 15,968      | 50        | 3.1  | 0.73 | 0.54-0.99 | 0.82 | 0.60-1.12 |
| Parity 0                      | 180,970     | 912       | 5.0  | 1.51 | 1.37-1.67 | 1.56 | 1.40-1.72 |
| ≥1 (ref.)                     | 209,121     | 698       | 3.3  | 1.00 | ( - )     | 1.00 | ( - )     |
| BMI (kg/m <sup>2</sup> ): <18 | 16,473      | 65        | 3.9  | 0.96 | 0.74-1.24 | 0.98 | 0.76-1.27 |
| 18-24 (ref.)                  | 167,813     | 691       | 4.1  | 1.00 | ( - )     | 1.00 | ( - )     |
| 25-29                         | 56,208      | 231       | 4.1  | 1.00 | 0.86-1.16 | 0.99 | 0.86-1.56 |
| ≥30                           | 33,730      | 166       | 4.9  | 1.20 | 1.01-1.42 | 1.18 | 0.99-1.40 |
| Missing                       | 115,881     | 457       | 3.9  | 0.96 | 0.85-1.08 | 1.03 | 0.91-1.16 |
| Plurality: Singleton (ref.)   | 385,104     | 1,596     | 7.1  | 1.00 | ( - )     | 1.00 | ( - )     |
| Multiple                      | 4,995       | 14        | 2.8  | 0.68 | 0.40-1.14 | 0.79 | 0.46-1.36 |
| Infant sex: Female (ref.)     | 190,993     | 534       | 2.8  | 1.00 | ( - )     | 1.00 | ( - )     |
| Male                          | 199,106     | 1,076     | 5.4  | 1.93 | 1.74-2.14 | 1.87 | 1.69-2.08 |
| Birth wt.: 2000-2499 g        | 5,315       | 17        | 3.2  | 0.84 | 0.52-1.36 | 0.87 | 0.53-1.41 |
| 2500-2999                     | 50,987      | 163       | 3.2  | 0.84 | 0.71-1.00 | 0.86 | 0.72-1.02 |
| 3000-3499 (ref.)              | 149,808     | 569       | 3.8  | 1.00 | ( - )     | 1.00 | ( - )     |
| 3500-3999                     | 131,133     | 566       | 4.3  | 1.14 | 1.01-1.28 | 1.11 | 0.99-1.25 |
| 4000-4499                     | 44,505      | 245       | 5.5  | 1.45 | 1.25-1.68 | 1.39 | 1.19-1.62 |
| ≥4500                         | 8,127       | 49        | 6.0  | 1.59 | 1.19-2.12 | 1.49 | 1.11-2.00 |
| Year 2004 (ref.)              | 36,593      | 116       | 3.2  | 1.00 | ( - )     | 1.00 | ( - )     |
| 2005                          | 36,791      | 126       | 3.4  | 1.08 | 0.84-1.39 | 1.08 | 0.84-1.39 |
| 2006                          | 37,802      | 112       | 3.0  | 0.93 | 0.72-1.21 | 0.93 | 0.72-1.21 |
| 2007                          | 39,743      | 131       | 3.3  | 1.04 | 0.81-1.33 | 1.03 | 0.80-1.33 |
| 2008                          | 40,267      | 164       | 4.1  | 1.28 | 1.01-1.63 | 1.28 | 1.01-1.62 |
| 2009                          | 40,367      | 154       | 3.8  | 1.20 | 0.95-1.53 | 1.20 | 0.94-1.53 |
| 2010                          | 39,610      | 165       | 4.2  | 1.31 | 1.04-1.67 | 1.31 | 1.03-1.66 |
| 2011                          | 39,827      | 208       | 5.2  | 1.65 | 1.31-2.07 | 1.66 | 1.32-2.08 |
| 2012                          | 39,936      | 204       | 5.1  | 1.61 | 1.28-2.02 | 1.62 | 1.29-2.04 |
| 2013                          | 39,169      | 230       | 5.9  | 1.85 | 1.48-2.31 | 1.87 | 1.49-2.33 |

Results for live births <2000 g not shown because of small numbers (<5 cases).

1  
2  
3  
4  
5  
6  
7  
8  
9  
10  
11  
12  
13  
14  
15  
16  
17  
18  
19  
20  
21  
22  
23  
24  
25  
26  
27  
28  
29  
30  
31  
32  
33  
34  
35  
36  
37  
38  
39  
40  
41  
42  
43  
44  
45  
46  
47  
48  
49  
50  
51  
52  
53  
54  
55  
56  
57  
58  
59  
60

**Figure legend**

Figure 1. Rates of ankyloglossia and frenotomy by year (panel A) and breast milk feeding (panel B), and temporal trends in frenotomy among ankyloglossia cases (panel C), British Columbia, Canada 2004 to 2013.

Confidential

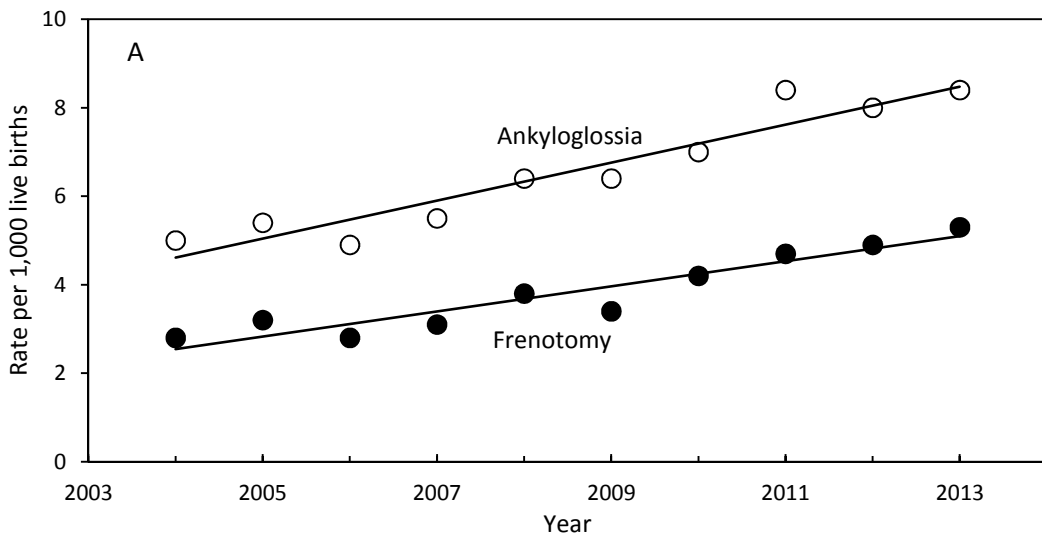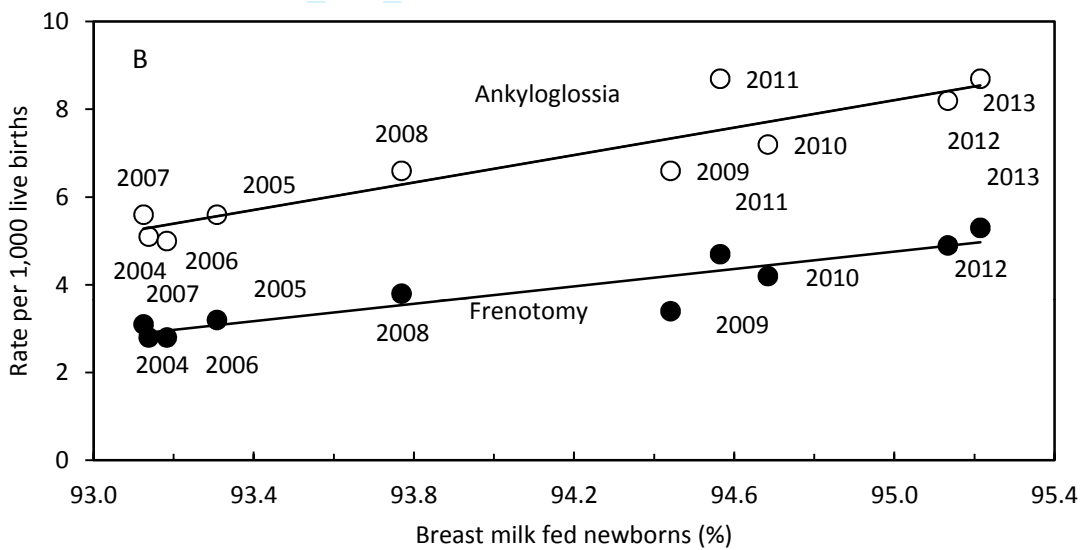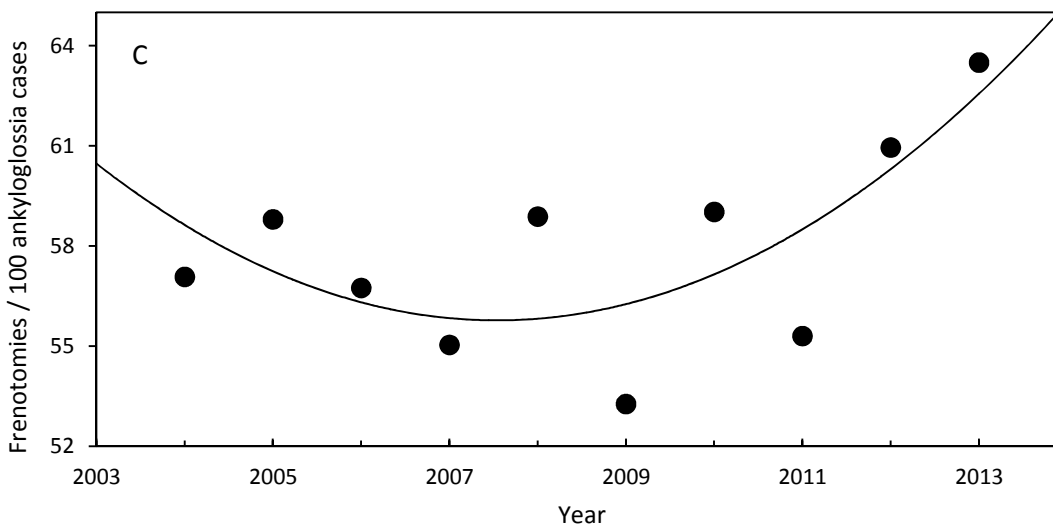

Supplement: supp_4.1.E33_2015-0063_original_submission.pdf [file supp_4.1.E33_2015-0063_original_submission.pdf]
